# Supplementary material for: Determination of Causative Human Papillomavirus Type in Tissue Specimens of Common Warts Based on Estimated Viral Loads
Source: Front Cell Infect Microbiol. 2020 Jan 24;10:4. doi: 10.3389/fcimb.2020.00004 (PMC6993575; doi:10.3389/fcimb.2020.00004)
Supplement: Supplementary Table 1 — Summary of previously published HPV prevalence studies performed on histologically confirmed tissue samples of common warts obtained from immunocompetent individuals. [file Data_Sheet_1.xlsx]

## Sheet: Supplementary table 1
Study author (year)	Country	Studied population	No. of included common warts/patientsa	Patients' age (years)	Patients' gender	Sampling method	HPV detection and typing method	Tested HPV types	Overall HPV detection rate	Overall HPV2/27/57 detection rate	HPV1 detection rate	Detection rate of other HPV types	Multiple HPV types detection rate
Gross (1982)	Germany	NA	18 warts (FF tissue samples)	NA	NA	Curettage, excision	Southern blot	HPV1, 2, 3, 4 and 6	18/18 (100.0)	HPV2/27/57: 15/18 (83.3) HPV2: 15/18 (83.3) HPV27: 0/18 (0) HPV57: 0/18 (0)	1/18 (5.6)	HPV4: 2/18 (11.1)	0
Chen (1993)	Taiwan and China	Dermatology clinic patients	42 warts	NA	NA	Biopsy	Southern blot	HPV1, 2, 3, 4, 5, 8, 11, 16 and 18	27/42 (64.3)	HPV2/27/57: 2/42 (4.8)b HPV2: 2/42 (4.8) HPV27: 0/42 (0) HPV57: 0/42 (0)	3/42 (7.1)	HPV4: 9/42 (21.4) HPV5: 1/42 (2.4) HPV11: 2/42 (4.8) HPV16: 0.5/42 (1.2) HPV18: 3.5/42 (8.3) Not identified: 7/42 (16.7)	Double: 2/42 (4.8) HPV11+16: 1/42 (2.4) HPV11+18: 1/42 (2.4)
Egawa (1994)	Japan	Dermatology clinic patients	12 warts (FF and FFPE tissue samples)c	NA	NA	Excision	In situ hybridization	HPV1, 4, 60, 63 and 65	12/12 (100.0)	0	0	HPV4: 3/12 (25.0) HPV60: 1/12 (8.3) HPV65: 8/12 (67.7)	0
Lei (2009)	China	Dermatology clinic patients	10 warts (FF and FFPE tissue samples)	NA	NA	Biopsy	PCR	HPV1, 2, 4, 7, 27, 57 and 65	10/10 (100.0)	HPV2/27/57: 7.5/10 (75.0) HPV2: 1/10 (10.0) HPV27: 1.5/10 (15.0) HPV57: 5/10 (50.0)	2.5/10 (25.0)	0	Double: 1/10 (10.0) HPV1+27: 1/10 (10.0)
Sun (2010)	China	Dermatology clinic patients	31 wartsd	Range: 5-70 Median: 35	Male: 21/31 Female: 10/31	Biopsy	PCR	HPV1, 2, 4, 6, 7, 11, 16, 18, 27 and 57	24/31 (77.4)	HPV2/27/57: 17/31 (54.8) HPV2: 4/31 (12.9) HPV27: 4/31 (12.9) HPV57: 9/31 (29.0)	1/31 (3.2)	HPV6: 1/31 (3.2) HPV7: 5/31 (16.1)	0
De Koning (2011)	Netherlands	Dermatology clinic and primary care patients	7 warts	Range: 19-62 Mean: 31	NA	Biopsy	HSL-PCR/MPG	HPV1, 2 , 3, 4, 7, 10, 27, 28, 29, 40, 41 43, 48, 50, 60, 57, 63, 65, 77, 88, 91, 94 and 95	6/7 (85.7)	HPV2/27/57: 5/7 (71.4) HPV2: 0/7 (0) HPV27: 4/7 (57.1) HPV57: 1/7 (14.3)	0/7 (0)	HPV3: 1/7 (14.3)	0
Šterbenc (2017)	Slovenia	Dermatology clinic patients	9 warts	NA	NA	Biopsy	PCR and type-specific real-time PCR	HPV1, 2, 3, 6, 10, 11, 27, 28, 29, 41, 57, 63, 77 and 204	9/9 (100.0)	HPV2/27/57 2.63/9 (29.2) HPV2: 0.33/9 (3.7) HPV27: 0.5/9 (5.5) HPV57: 1.8/9 (20.0)	4.17/9 (46.3)	HPV63: 1.6/9 (17.8) HPV204: 0.5/9 (5.5)	Overall multiple: 8/9 (88.9) Double: 6/9 (66.7) HPV1+27: 1/9 (11.1) HPV1+57: 2/9 (22.2) HPV1+63: 2/9 (22.2) HPV57+204: 1/9 (11.1) Triple: 2/9 (22.2) HPV1+2+63: 1/9 (11.1) HPV1+57+63: 1/9 (11.1)
ABBREVIATIONS
FF	fresh frozen
FFPE	formalin-fixed and paraffin-embedded
HPV	human papillomavirus
HSL-PCR/MPG	hyperkeratotic skin lesion-polymerase chain reaction/multiplex genotyping
NA	not available
PCR	polymerase chain reaction
aUnless otherwise specified, one common wart was obtained from each patient.
bPossible cross-hybridization of probes or presence of mixed infections.
cOnly common warts with histologically confirmed intracytoplasmic inclusion bodies were included in the study.
dNot all common warts were histologically examined.
In order to properly compare with our study, only the data on common warts of immunocompetent patients, attending dermatology clinic were included

## Sheet: Supplementary table 2
Sample number	Sample code		Detected HPV types in a CW sample					HPV63 copies/cell		Determined causative HPV type
		Location of CW		HPV2 copies/cell	HPV27 copies/cell	HPV57 copies/cell	HPV1 copies/cell		HPV204 copies/cell
1	CW002	hand	57			7.2x104				57
2	CW005B	hand	27		4.4x104					27
3	CW011A	head	57			1.2x104				57
4	CW011B	head	57			5.3x103				57
5	CW019	hand	57			2.9x104				57
6	CW022	leg	27		3.2x104					27
7	CW024	hand	27		2.4x104					27
8	CW025A	leg	27		6.3x103					27
9	CW026A	hand	57			5.3x104				57
10	CW038A	arm	57			2.9x103				57
11	CW043B	arm	27		2.7x104					27
12	CW052	leg	57			1.0x104				57
13	CW066	hand	2	1.1x105						2
14	CW081	hand	27		5.0x104					27
15	CW092B	hand	27		1.8x104					27
16	CW094A	hand	57			6.0x101				57
17	CW095A	hand	27		3.4x104					27
18	CW095B	hand	27		1.0x104					27
19	CW096A	hand	2	4.5x104						2
20	CW096B	hand	2	3.5x104						2
21	CW114A	hand	2	2.5x10-3						WD
22	CW114B	hand	2	1.4x105						2
23	CW115A	hand	27		2.8x104					27
24	CW121B	hand	57			2.8x104				57
25	CW126	hand	27		1.7x105					27
26	CW130B	hand	27		1.0x105					27
27	CW131A	leg	2	4.7x103						2
28	CW141A	hand	57			1x10-3				WD
29	CW141B	hand	63					1.5x10-3		WD
30	CW157	hand	1				7.1x106			1
31	CW169B	hand	27		1.7x105					27
32	CW188	head	57			1.9x104				57
33	CW196E	head	57			2.4x104				57
34	CW200	hand	1				2.3x105			1
35	CW201B	hand	63					1.1x10-3		WD
36	CW204A	hand	57			4.3x104				57
37	CW207A	hand	57			7.0x10-4				WD
38	CW211A	hand	57			6.9x104				57
39	CW213A	hand	2	3.2x104						2
40	CW215A	hand	57			6.0x10-4				WD
41	CW228A	head	57			1.2x104				57
42	CW241A	leg	27		3.2x104					27
43	CW243A	hand	57			2.1x101				57
44	CW245A	hand	57			6.8x104				57
45	CW245C	head	57			9.2x103				57
46	CW246B	leg	57			1.7x105				57
47	CW248	arm	2	9.8x103						2
48	CW249A	hand	57			2.5x103				57
49	CW253A	hand	1				8.2x10-3			WD
50	CW254A	leg	1				5.0x10-4			WD
51	CW260C	hand	1				6.8x10-3			WD
52	CW270	hand	27		2.5x105					27
53	CW276	hand	63					1.8x10-2		WD
ABBREVIATIONS
WD	warts without determined causative HPV

## Sheet: Supplementary table 3
Sample number	Sample code		Detected HPV types in a CW sample					HPV63 copies/cell		Determined causative HPV type
		Location of CW		HPV2 copies/cell	HPV27 copies/cell	HPV57 copies/cell	HPV1 copies/cell		HPV204 copies/cell
1	CW026C	leg	1+57			7.9x103	4.8x10-3			57
2	CW038B	arm	1+57			1.7x104	9.7x10-3			57
3	CW040B	hand	1+94				2.6x10-2			WD
4	CW043A	hand	1+27		3.5x104		9.6x10-3			27
5	CW046	hand	1+2	3.4x104			8.2x10-3			2
6	CW049A	hand	1+57			1.1x103	1.7x10-2			57
7	CW049B	hand	1+57			9.7x102	1.1.x10-2			57
8	CW065A	hand	1+57			2.9x102	1.6x10-1			57
9	CW078C	hand	1+27		3.8x10-3		2.1x10-3			WD
10	CW080	head	1+57			1.5x104	5.1x10-3			57
11	CW083A	hand	1+27		1.0x10-1		6.1x10-3			WD
12	CW085C	hand	1+57			2.9x104	1.1x10-2			57
13	CW086B	hand	1+2	4.6x104			9.9x10-3			2
14	CW087C	arm	27+57		4.3x10-2	1.2x102				57
15	CW092A	hand	1+27		2.0x104		6.0x10-3			27
16	CW093	hand	1+57			4.8x104	5.4x10-3			57
17	CW094C	hand	27+57		2.6x10-3	6.0x10-4				WD
18	CW112B	arm	1+57			1.5x104	7.9x10-3			57
19	CW115B	hand	1+27		3.7x104		8.5x10-3			27
20	CW117	hand	1+7				4.9x10-2			WD
21	CW124A	hand	57+63			5.2x103		2.1x10-3		57
22	CW125A	arm	1+57			3.8x103	7.0x10-4			57
23	CW130A	hand	1+27		1.8x103		2.5x10-1			27
24	CW138A	hand	1+57			1.0x105	3.3x10-1			57
25	CW139B	hand	1+27		1.4x105		3.7x10-1			27
26	CW142A	hand	1+57			1.3x105	1.1x10-2			57
27	CW142B	hand	1+57			4.7x102	4.1x10-3			57
28	CW155	head	57+204			3.9x104			8.3x10-3	57
29	CW160A	hand	1+27		3.6x105		2.3x10-2			27
30	CW160C	hand	1+27		7.3x104		2.1x100			1+27
31	CW162A	hand	1+57			3,33x104	4.0x10-3			57
32	CW171B	arm	7+57			1.9x10-3				WD
33	CW175A	hand	1+57			2.1x105	6.3x100			1+57
34	CW177A	hand	1+57			4.2x104	7.0x10-2			57
35	CW178A	leg	1+57			3,8x104	4.6x10-2			57
36	CW178B	leg	1+57+204			2.7x105	3.7x10-1		3.1x10-3	57
37	CW179A	hand	1+57			1.2x104	2.8x10-3			57
38	CW179C	arm	1+57			5.1x102	8.2x10-1			57
39	CW181A	hand	1+57			1.4x10-3	1.5x101			1
40	CW182A	leg	1+2	6.6x102			1.5x10-2			2
41	CW182C	hand	1+2	2.6x104			5.9x10-2			2
42	CW183A	leg	1+27+63		4.2x103		1.2x10-2	7.8x10-3		27
43	CW189A	hand	1+57			7.0x10-4	3.0x10-3			WD
44	CW190	arm	1+57			7.0x104	2.5x10-3			57
45	CW196A	hand	1+57			1.2x105	4.2x10-3			57
46	CW196C	hand	1+57			5.9x104	7.9x10-3			57
47	CW196D	head	1+57			4.5x104	1.0x10-3			57
48	CW201C	hand	1+10+63				5.7x10-3	2.1x10-3		WD
49	CW206	hand	1+7				4.6x10-3			WD
50	CW209A	hand	1+117				2.1x10-2			WD
51	CW211B	hand	1+57			9.4x104	6.0x10-3			57
52	CW212A	hand	57+63			1.0x105		2.8x10-3		57
53	CW217C	leg	1+27+57		3.7x10-3	1.2x105	1.2x10-1			57
54	CW223B	hand	1+10				2.5x10-2			WD
55	CW223C	hand	1+10				3.3x10-3			WD
56	CW230	arm	1+2+27	4.4x102	7.1x10-1		6.3x10-3			2
57	CW239A	hand	1+29				1.7x10-3			WD
58	CW240B	leg	27+57		3.1x10-3	3.1x101				57
59	CW251A	hand	1+27		9.3x104		1.3x10-2			27
60	CW257B	hand	1+57			3.8x104	3.6x10-2			57
61	CW260A	hand	1+63				1.6x10-2	6.6x10-3		WD
62	CW260B	hand	1+63				1.4x10-1	1.1x10-2		WD
63	CW262A	leg	1+57			2.6x104	6.5x10-1			57
64	CW273	head	1+57			6.5x104	2.6x10-1			57
65	CW275B	leg	1+57			1.4x105	2.5x10-1			57
66	CW275C	hand	1+57			1.0x105	1.6x102			1+57
67	CW277A	hand	1+27		5.6x103		5.0x10-2			27
68	CW277B	hand	1+27		7.9x104		2.6x10-3			27
69	CW277C	hand	1+27		2.6x105		3.9x10-2			27
70	CW278B	leg	1+27		3.8x104		5.8x10-1			27
71	CW278C	hand	1+27		2.9x104		1.6x100			1+27
ABBREVIATIONS
WD	warts without determined causative HPV
aIn warts with multiple (at least two) potentially causative HPV types, the relative proportion of each HPV was calculated, summing up to 71 warts.
